# Supplementary material for: Quantification of Detergents Complexed with Membrane Proteins
Source: PubMed Central journal article supplement (PMC5297245; doi:10.1038/srep41751), 2017-02-08
Supplement: srep41751-s1.pdf [file srep41751-s1.pdf]

## SUPPLEMENTARY INFORMATION

### QUANTIFICATION OF DETERGENTS COMPLEXED WITH MEMBRANE PROTEINS

Vincent Chaptal<sup>1‡</sup>, Frédéric Delolme<sup>2‡</sup>, Arnaud Kilburg<sup>1‡</sup>, Sandrine Magnard<sup>1</sup>, Cédric Montigny<sup>3</sup>, Martin Picard<sup>4</sup>, Charlène Prier<sup>1</sup>, Luca Monticelli<sup>1</sup>, Olivier Bornert<sup>5</sup>, Morgane Agez<sup>6</sup>, Stéphanie Ravaut<sup>7</sup>, Cédric Orelle<sup>1</sup>, Renaud Wagner<sup>5</sup>, Anass Jawhari<sup>6</sup>, Isabelle Broutin<sup>8</sup>, Eva Pebay-Peyroula<sup>7</sup>, Jean-Michel Jault<sup>1</sup>, H. Ronald Kaback<sup>9</sup>, Marc Le Maire<sup>3</sup> & Pierre Falson<sup>1‡\*</sup>

<sup>1</sup>Laboratory of Molecular Microbiology and Structural Biochemistry, CNRS UMR 5086, IBCP, Lyon 69367 France,

<sup>2</sup>Protein Science Facility, UMS 3444, IBCP, Lyon 69367 France

<sup>3</sup>Institute for Integrative Biology of the Cell (I2BC), CEA, CNRS, Université Paris-Sud, 91198 Gif-sur-Yvette, France

<sup>4</sup>Laboratoire de Biologie Physico-Chimique des Protéines Membranaires, CNRS UMR 7099, 75005 Paris France

<sup>5</sup>Institut de Recherche de l'Ecole de Biotechnologie de Strasbourg, University of Strasbourg-CNRS, Ill-kirch, France

<sup>6</sup>CALIXAR, 60 Avenue Rockefeller - 69008 Lyon France,

<sup>7</sup>Institut de Biologie Structurale (IBS), Univ. Grenoble Alpes, CEA, CNRS, 38044 Grenoble, France

<sup>8</sup>Laboratoire de Cristallographie et RMN Biologiques, CNRS UMR 8015, 75006 Paris, France,

<sup>9</sup>Department of Physiology, David Geffen School of Medicine, UCLA, Los Angeles, CA 90095 USA

\* [pierre.falson@ibcp.fr](mailto:pierre.falson@ibcp.fr)

‡These authors contributed equally to this work.

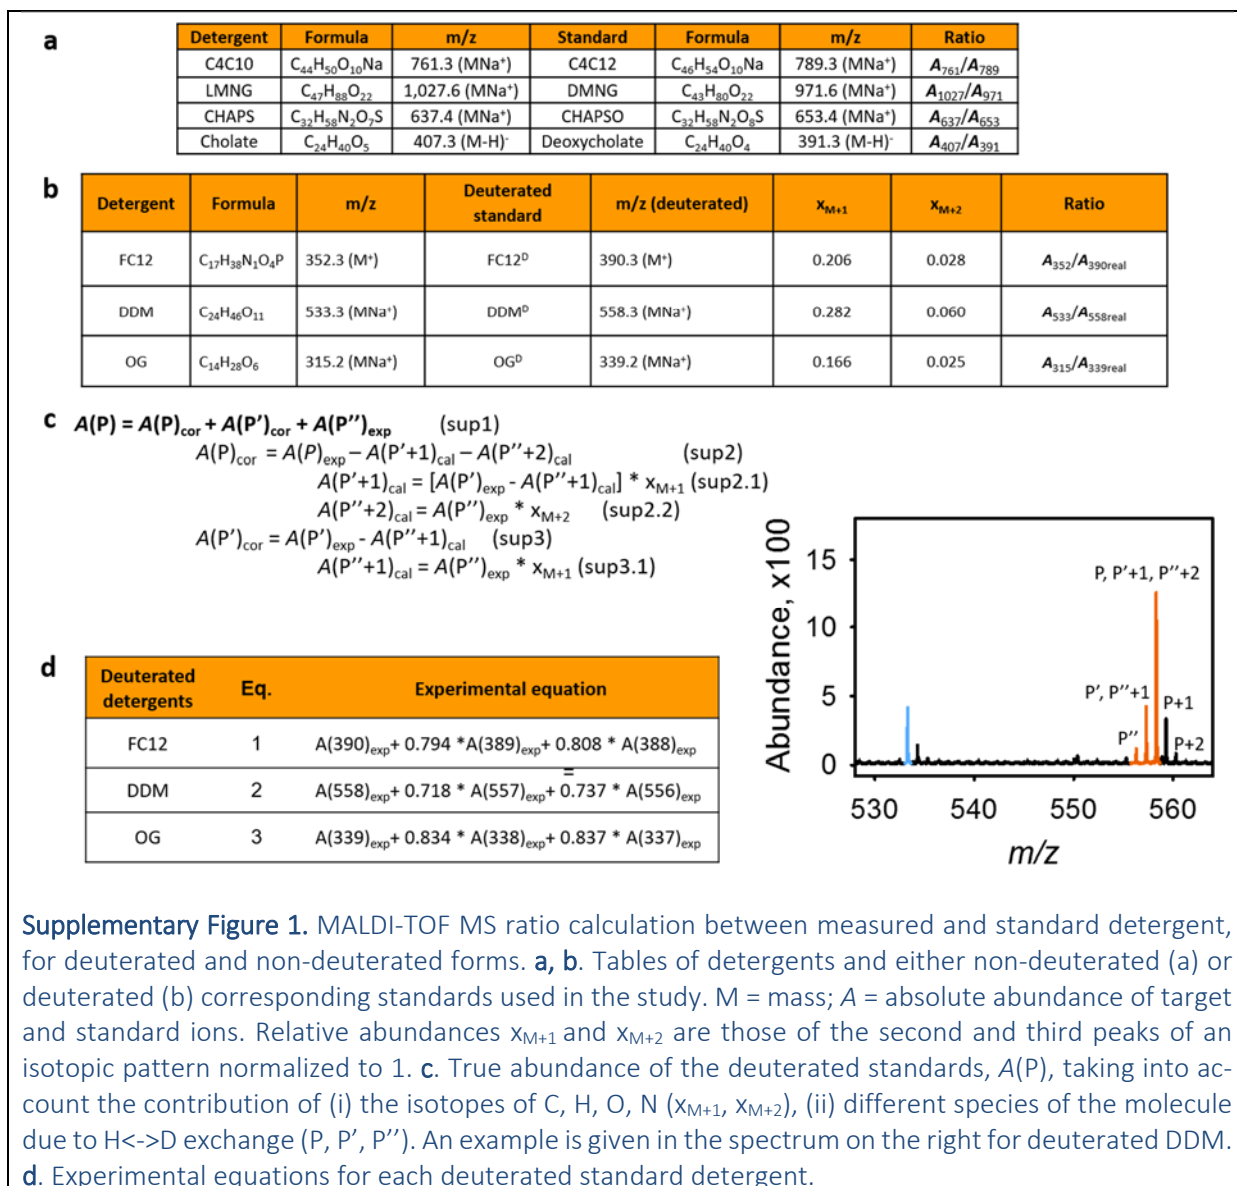

**Supplementary Figure 1.** MALDI-TOF MS ratio calculation between measured and standard detergent, for deuterated and non-deuterated forms. **a, b.** Tables of detergents and either non-deuterated (a) or deuterated (b) corresponding standards used in the study. M = mass; A = absolute abundance of target and standard ions. Relative abundances  $x_{M+1}$  and  $x_{M+2}$  are those of the second and third peaks of an isotopic pattern normalized to 1. **c.** True abundance of the deuterated standards, A(P), taking into account the contribution of (i) the isotopes of C, H, O, N ( $x_{M+1}$ ,  $x_{M+2}$ ), (ii) different species of the molecule due to H $\leftrightarrow$ D exchange (P, P', P''). An example is given in the spectrum on the right for deuterated DDM. **d.** Experimental equations for each deuterated standard detergent.

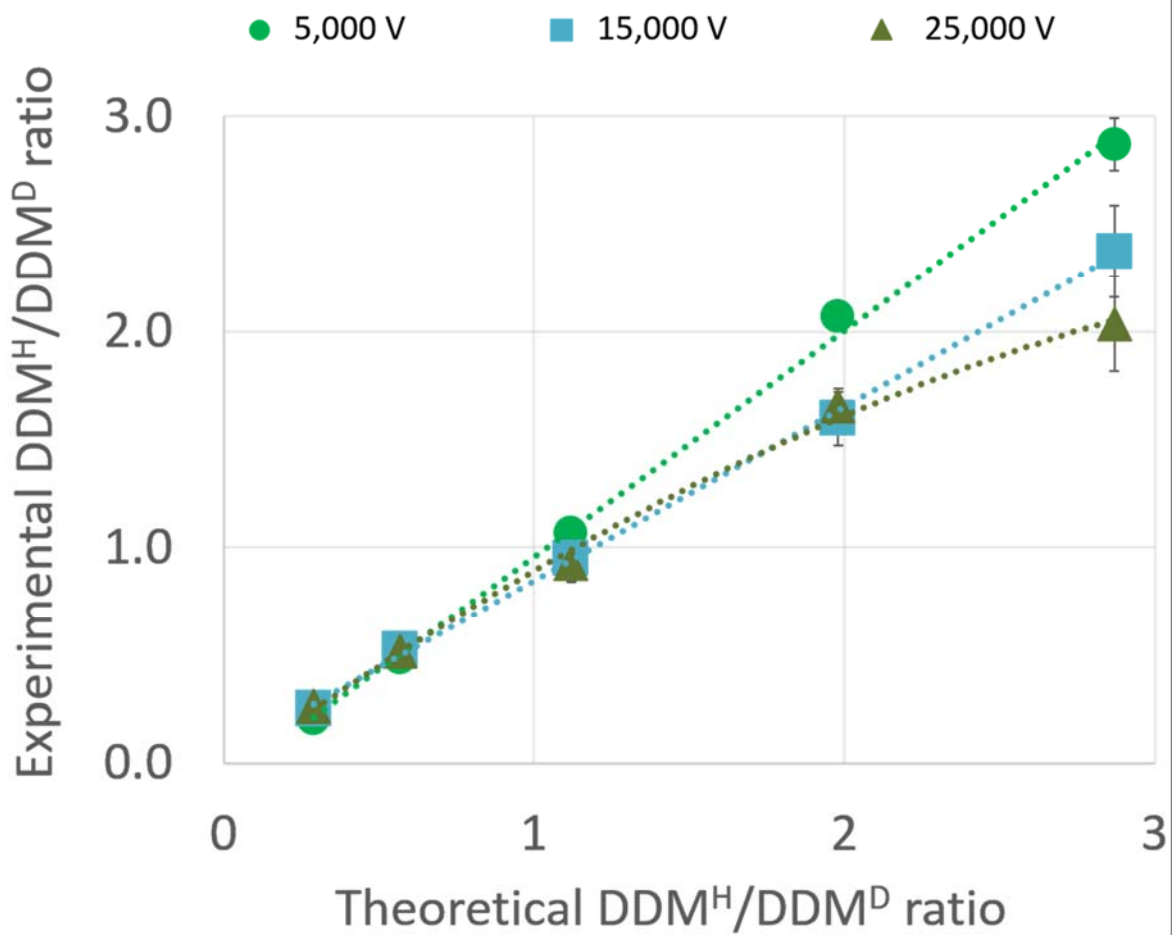

**Supplementary Figure 2.** Calibration curves at 3 accelerating voltages for DDM assayed at 0, 0.03, 0.1 and 0.3 % using 0.1 % DDM<sup>D</sup> as standard. [DDM<sup>H</sup>]/[DDM<sup>D</sup>] experimental ratios are plotted in respect to [DDM<sup>H</sup>]/[DDM<sup>D</sup>] theoretical ratios. The experiment was done in triplicate, fitted with a linear regression with Excel.

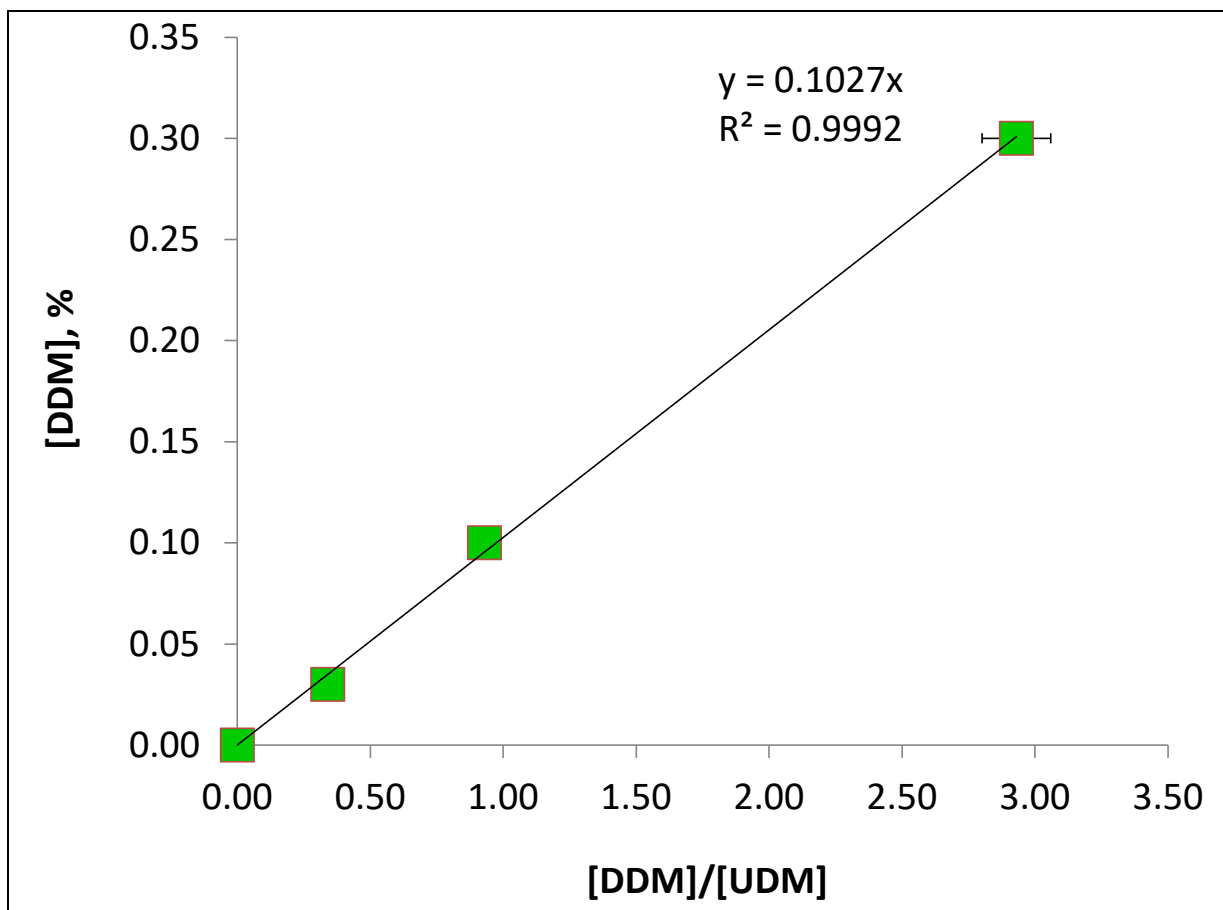

**Supplementary Figure 3.** DDM quantification with UDM by MALDI-TOF MS. Calibration curve for DDM assayed at 0, 0.03, 0.1 and 0.3 % using 0.1 % UDM as standard. DDM concentration is plotted as the amount of measured DDM (% w/v) in respect to assayed DDM/UDM abundance ratios. The experiment was done in triplicate, fitted with a linear regression with SigmaPlot V12.5

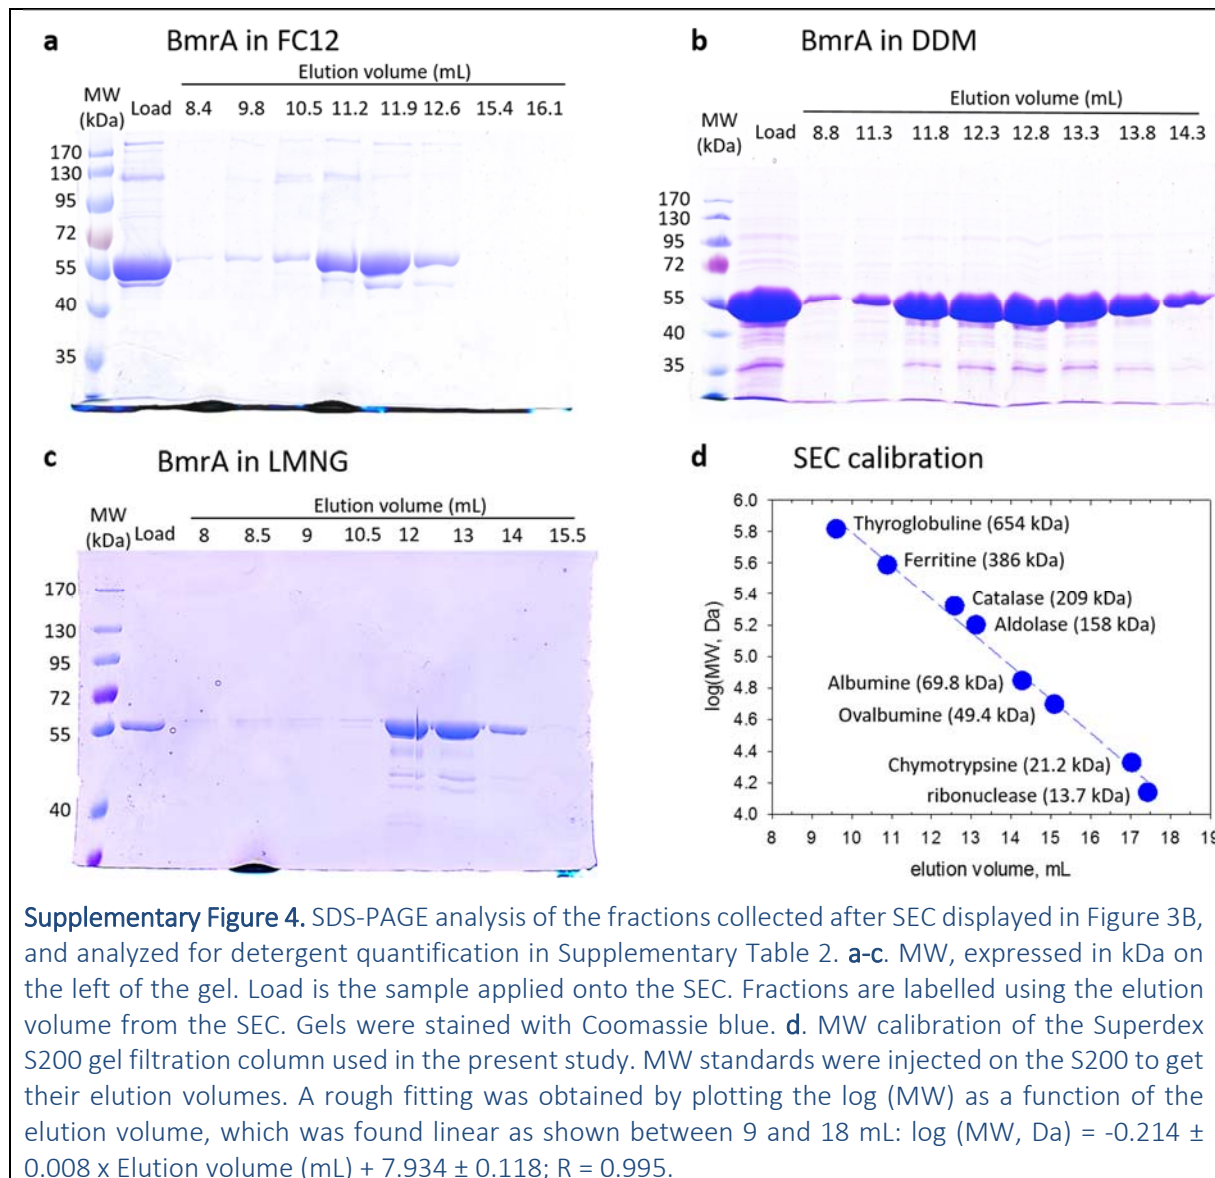

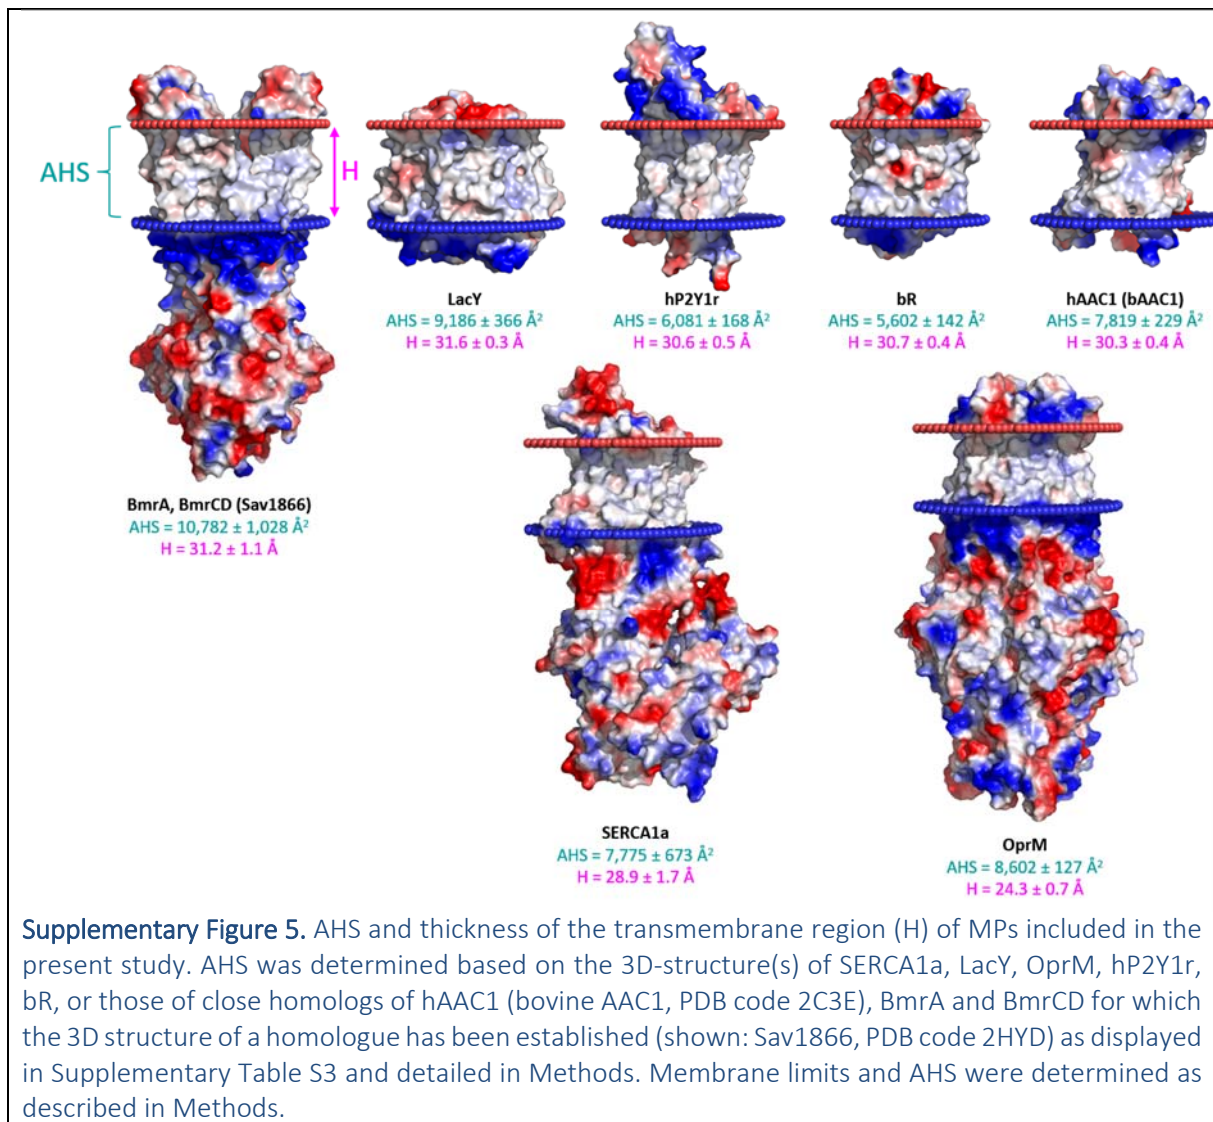

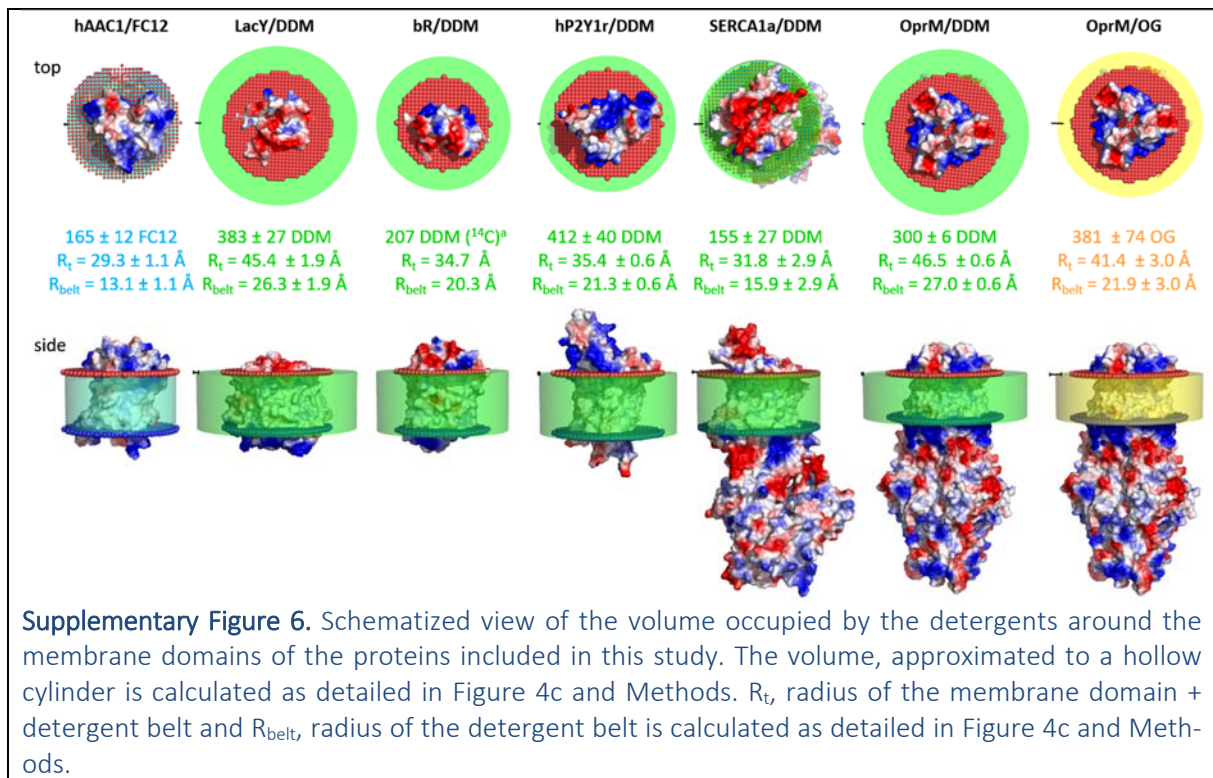

**Supplementary Table 1.** Intra-day and inter-day CVs for FC12 and DDM detergents. Data are reported as [FC12<sup>H</sup>]/[FC12<sup>D</sup>] or [DDM<sup>H</sup>]/[DDM<sup>D</sup>] (theoretical ratios of 0.3-1-3). For intra-day CVs (Day 1, Day2, Day3), data are the mean of 3 experiments done in the same day. For inter-day CVs, data are the mean of Day 1, Day 2 and Day 3.

| FC12 <sup>H</sup> /FC12 <sup>D</sup> | 0.3  | 1    | 0.3  |
|--------------------------------------|------|------|------|
| <b>Intra-day precision</b>           |      |      |      |
| <i>Day 1</i>                         |      |      |      |
| Mean (n=3)                           | 0.34 | 0.99 | 2.77 |
| CV (%)                               | 8.4  | 3.7  | 12.8 |
| <i>Day 2</i>                         |      |      |      |
| Mean (n=3)                           | 0.45 | 1.18 | 3.38 |
| CV (%)                               | 7.4  | 3.3  | 5.0  |
| <i>Day 3</i>                         |      |      |      |
| Mean (n=3)                           | 0.32 | 1.02 | 2.86 |
| CV (%)                               | 0.5  | 3.0  | 9.5  |
| <b>Inter-day precision</b>           |      |      |      |
| Mean (n=3)                           | 0.37 | 1.06 | 3.0  |
| CV (%)                               | 18.0 | 9.0  | 12.0 |
| DDM <sup>H</sup> /DDM <sup>D</sup>   | 0.3  | 1    | 0.3  |
| <b>Intra-day precision</b>           |      |      |      |
| <i>Day 1</i>                         |      |      |      |
| Mean (n=3)                           | 0.34 | 1.15 | 3.34 |
| CV (%)                               | 3.0  | 2.2  | 2.2  |
| <i>Day 2</i>                         |      |      |      |
| Mean (n=3)                           | 0.38 | 1.04 | 3.20 |
| CV (%)                               | 1.9  | 2.4  | 0.5  |
| <i>Day 3</i>                         |      |      |      |
| Mean (n=3)                           | 0.39 | 1.09 | 3.07 |
| CV (%)                               | 3.0  | 2.3  | 3.8  |
| <b>Inter-day precision</b>           |      |      |      |
| Mean (n=3)                           | 0.37 | 1.09 | 3.2  |
| CV (%)                               | 6.0  | 5.0  | 4.0  |



**Supplementary Table 2.** Detergent quantification after SEC displayed in Figure 4. The corrected concentration of each detergent is the concentration measured in the sample minus the buffer detergent concentration. In bold are the fractions taken for the calculation of the average of the peak summarized in Figure 4. For LMNG, since the free micelle is overlapping with the detergent peak, fractions were taken on the opposite fractions of the peak so that the free micelle peak does not interfere with the measurement. The concentration of BmrA correspond to its dimeric (native) form.

| Detergent | Elution volume (ml) | [Det]corrected (mM) | [BmrA] (mM)  | Ratio Det/BmrA |
|-----------|---------------------|---------------------|--------------|----------------|
| FC12      | 9.8                 | 1.54                | 2.1          | 739            |
|           | 10.5                | 1.46                | 4.8          | 306            |
|           | <b>11.2</b>         | <b>4.22</b>         | <b>7.9</b>   | <b>532</b>     |
|           | <b>11.9</b>         | <b>5.62</b>         | <b>8.7</b>   | <b>646</b>     |
|           | 12.6                | 2.43                | 2.9          | 833            |
|           | 13.3                | 1.71                | -            | -              |
|           | 14                  | 0.73                | -            | -              |
|           | 14.7                | 0.76                | -            | -              |
| DDM       | 11                  | 0.78                | 3.38         | -              |
|           | <b>11.5</b>         | <b>4.14</b>         | <b>9.46</b>  | <b>438</b>     |
|           | <b>12.5</b>         | <b>4.76</b>         | <b>11.92</b> | <b>399</b>     |
|           | <b>13</b>           | <b>3.16</b>         | <b>7.92</b>  | <b>399</b>     |
|           | <b>13.5</b>         | <b>1.68</b>         | <b>4.46</b>  | <b>376</b>     |
|           | 14                  | 2.31                | -            | -              |
|           | 14.5                | 5.33                | -            | -              |
|           | 15.5                | 6.25                | -            | -              |
| LMNG      | 10                  | 0.05                | -            | -              |
|           | 10.5                | 0.79                | 0.8          | -              |
|           | 11                  | 0.75                | 2.2          | 335            |
|           | <b>12</b>           | <b>1.07</b>         | <b>5.8</b>   | <b>184</b>     |
|           | <b>12.5</b>         | <b>0.92</b>         | <b>5.9</b>   | <b>156</b>     |
|           | <b>14</b>           | <b>0.26</b>         | <b>1.5</b>   | <b>176</b>     |
|           | 15.5                | 0.09                | -            | -              |

**Supplementary Table 3.** Membrane domain thickness and accessible hydrophobic surface (AHS) calculations of the MPs included in the present study. Both parameters were calculated as described in Methods using all 3D-structures reported for each MP in the Protein Data Bank, except for SERCA1a for which only the 3D-structures in the calcium-bound E1 conformation were considered accordingly to the experimental conditions. For BmrA and BmrCD for which the 3D-structure is not known, we related proteins belonging to the ABC exporter's family.

| Membrane Protein |                           |                   | Membrane domain       |                                                       |
|------------------|---------------------------|-------------------|-----------------------|-------------------------------------------------------|
| Family           | protein                   | PDB code          | Thickness, Å          | Accessible Hydrophobic Surface @1.5 Å, Å <sup>2</sup> |
| ABC exporters    | Sav1866                   | 2onj              | 30.4                  | 11,275                                                |
|                  |                           | 2hyd              | 31.2                  | 11,373                                                |
|                  | MsbA                      | 3b60              | 32                    | 11,784                                                |
|                  |                           | Mouse ABCB1       | 3g5u                  | 30.4                                                  |
|                  | 4lsg                      |                   | 31                    | 10,420                                                |
|                  | 3g60                      |                   | 30.6                  | 10,737                                                |
|                  | 3g61                      |                   | 30.6                  | 10,973                                                |
|                  | 4ksb                      |                   | 29.8                  | 11,272                                                |
|                  | 4ksc                      |                   | 30.8                  | 12,253                                                |
|                  | 4ksd                      |                   | 30.2                  | 11,327                                                |
|                  | 4m1m                      |                   | 31                    | 10,341                                                |
|                  | 4m2s                      |                   | 31.2                  | 10,238                                                |
|                  | 4m2t                      |                   | 30.8                  | 10,340                                                |
|                  | <i>C. elegans</i> ABCB1   | 4f4c              | 33                    | 10,558                                                |
|                  | ABCB10                    | 4ayt              | 31                    | 13,055                                                |
|                  |                           | 4ayx              | 30.6                  | 12,851                                                |
|                  |                           | 4ayw              | 30.4                  | 12,184                                                |
|                  |                           | 3zdq              | 30.4                  | 12,758                                                |
|                  | TM287/288                 | 3qf4              | 30.6                  | 9,700                                                 |
|                  |                           | 4q4h              | 30.8                  | 9,752                                                 |
|                  |                           | 4q4j              | 30.2                  | 9,779                                                 |
|                  |                           | 4q4a              | 30.6                  | 9,834                                                 |
|                  | Atm1 <i>S. cerevisiae</i> | 4myc              | 30.8                  | 10,047                                                |
|                  |                           | 4myh              | 30.4                  | 9,839                                                 |
|                  | Na Atm1                   | 4mrn              | 31.4                  | 9,928                                                 |
|                  |                           | 4mrp              | 32                    | 9,926                                                 |
|                  |                           | 4mrs              | 31.6                  | 9,832                                                 |
| 4mrv             |                           | 31.8              | 9,880                 |                                                       |
| McjD             | 4pl0                      | 31.4              | 10,089                |                                                       |
| CmABCB1          | 3wmg                      | 35.4              | 11,414                |                                                       |
|                  | 3wme                      | 31.2              | 9,287                 |                                                       |
|                  | 3wmf                      | 33.8              | 9,811                 |                                                       |
| PglK             | 5c78                      | 31.2              | 11,414                |                                                       |
|                  | 5c76                      | 32                | 11,819                |                                                       |
| <b>All</b>       | <b>Mean</b>               | <b>31.2 ± 1.1</b> | <b>10,782 ± 1,028</b> |                                                       |

| Membrane Protein  |                          |                   | Membrane domain    |                                                       |
|-------------------|--------------------------|-------------------|--------------------|-------------------------------------------------------|
| Family            | protein                  | PDB code          | Thickness, Å       | Accessible Hydrophobic Surface @1.5 Å, Å <sup>2</sup> |
| Efflux Systems    | OprM                     | 1wp1              | 23.8               | 8,886                                                 |
|                   |                          | 3d5k (full)       | 24.8               | 8,763                                                 |
|                   | <b>All</b>               | <b>Mean</b>       | <b>24.3 ± 0.7</b>  | <b>8,602 ± 127</b>                                    |
| ADP/ATP Exchanger | hAAC1                    | 2c3e              | 29.8               | 7,557                                                 |
|                   |                          | 1okc              | 30.2               | 7,911                                                 |
|                   |                          | 4c9g              | 31                 | 7,944                                                 |
|                   |                          | 4c9h              | 30.6               | 8,100                                                 |
|                   |                          | 4c9q              | 30                 | 7,525                                                 |
|                   |                          | 4c9j              | 30.4               | 7,876                                                 |
|                   | <b>All</b>               | <b>Mean</b>       | <b>30.3 ± 0.4</b>  | <b>7,819 ± 229</b>                                    |
| Major Facilitator | LacY                     | 2y5y              | 31.4               | 9,128                                                 |
|                   |                          | 1pv7              | 31.2               | 9,212                                                 |
|                   |                          | 4zyr              | 32                 | 9,648                                                 |
|                   |                          | 2v8n              | 31.6               | 8,757                                                 |
|                   | <b>All</b>               | <b>Mean</b>       | <b>31.6 ± 0.3</b>  | <b>9,186 ± 366</b>                                    |
| P-type ATPase     | SERCA<br>E1 conformation | 1t5s              | 27.4               | 6,914                                                 |
|                   |                          | 1su4              | 30.2               | 8,707                                                 |
|                   |                          | 1t5t              | 27.2               | 6,852                                                 |
|                   |                          | 1vfp              | 29.6               | 7,447                                                 |
|                   |                          | 2c9m              | 29.6               | 8,228                                                 |
|                   |                          | 2zbd              | 32                 | 8,513                                                 |
|                   |                          | 3ba6              | 30                 | 7,247                                                 |
|                   |                          | 3ar2              | 29.2               | 7,815                                                 |
|                   |                          | 3n8g              | 29.8               | 7,314                                                 |
|                   |                          | 3w5a              | 29.8               | 8,319                                                 |
|                   |                          | 3w5b              | 29.8               | 8,639                                                 |
|                   |                          | 4h1w              | 27                 | 8,207                                                 |
|                   |                          | 4nab              | 26.8               | 7,800                                                 |
|                   |                          | 4xou              | 26.4               | 6,852                                                 |
| <b>All</b>        | <b>Mean</b>              | <b>28.9 ± 1.7</b> | <b>7,775 ± 673</b> |                                                       |

| Membrane Protein         |            |             | Membrane domain   |                                                       |
|--------------------------|------------|-------------|-------------------|-------------------------------------------------------|
| Family                   | protein    | PDB code    | Thickness, Å      | Accessible Hydrophobic Surface @1.5 Å, Å <sup>2</sup> |
| 7TM                      | hP2Y1r     | 2ydo        | 31                | 6,009                                                 |
|                          |            | 2ydv        | 30.8              | 5,997                                                 |
|                          |            | 3eml        | 31.2              | 6,138                                                 |
|                          |            | 3pwh        | 29.6              | 6,122                                                 |
|                          |            | 3qak        | 30.2              | 5,823                                                 |
|                          |            | 3rey        | 30.6              | 6,177                                                 |
|                          |            | 3rfm        | 30.4              | 6,123                                                 |
|                          |            | 3uza        | 30.2              | 6,138                                                 |
|                          |            | 3uzc        | 30.2              | 6,203                                                 |
|                          |            | 3vg9        | 30.2              | 5,897                                                 |
|                          |            | 3vga        | 30.8              | 5,900                                                 |
|                          |            | 4eiy        | 31.6              | 6,441                                                 |
|                          |            | <b>All</b>  | <b>Mean</b>       | <b>30.6 ± 0.5</b>                                     |
| 7TM<br>Bacteriorhodopsin | dark       | 1x0s        | 31                | 5,710                                                 |
|                          | K          | 1m0k        | 30.4              | 5,476                                                 |
|                          | K          | 1qkp        | 30.6              | 5,615                                                 |
|                          | L          | 1ucq        | 31                | 5,677                                                 |
|                          | L          | 1o0a        | 31.2              | 5,523                                                 |
|                          | M1         | 1m0m        | 30.2              | 5,474                                                 |
|                          | M1         | 1p8h        | 30.4              | 5,463                                                 |
|                          | N          | 1p8u        | 30.4              | 5,589                                                 |
|                          | O          | 3vi0        | 31.2              | 5,895                                                 |
|                          | <b>All</b> | <b>Mean</b> | <b>30.7 ± 0.4</b> | <b>5,602 ± 142</b>                                    |

**Supplementary Table 4.** Detergent properties as given by The Protein Data Bank in Europe (<http://www.ebi.ac.uk/pdbe/>) and from Anatrace (<https://www.anatrace.com/Products/Detergents.aspx>). The volume of each detergent is calculated by using the program VOIDOO <sup>1</sup> (<http://xray.bmc.uu.se/usf/voidoo.html>).

|      |                                                                                                                            |                                                                                                                                                 |
|------|----------------------------------------------------------------------------------------------------------------------------|-------------------------------------------------------------------------------------------------------------------------------------------------|
| DDM  | $C_{24}H_{46}O_{11}$                                                                                                       | 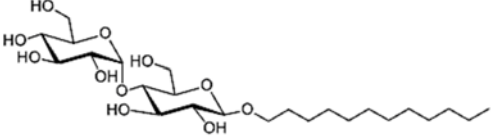                                                              |
|      | 510.621 g/mol                                                                                                              |                                                                                                                                                 |
|      | Smiles: <chem>CCCCCCCCCOC2OC(CO)C(OC1OC(CO)C(O)C(O)C1O)C(O)C2O</chem>                                                      |                                                                                                                                                 |
|      | Volume : 453 Å <sup>3</sup>                                                                                                | <a href="http://www.ebi.ac.uk/pdbe-srv/pdbechem/chemicalCompound/show/LMT">http://www.ebi.ac.uk/pdbe-srv/pdbechem/chemicalCompound/show/LMT</a> |
| FC12 | $C_{17}H_{38}NO_4P$                                                                                                        |                                                               |
|      | 315.5 g/mol                                                                                                                |                                                                                                                                                 |
|      | Smiles: <chem>CCCCCCCCCOP([O-])(=O)OCC[N+](C)(C)C</chem>                                                                   |                                                                                                                                                 |
|      | Volume : 344 Å <sup>3</sup>                                                                                                | <a href="http://www.anatrace.com/Products/Lipids/FOS-CHOLINE/F308S.aspx">http://www.anatrace.com/Products/Lipids/FOS-CHOLINE/F308S.aspx</a>     |
| OG   | $C_{14}H_{28}O_6$                                                                                                          |                                                                |
|      | 292.369 g/mol                                                                                                              |                                                                                                                                                 |
|      | Smiles : <chem>CCCCCCCCOC1OC(CO)C(O)C(O)C1O</chem>                                                                         |                                                                                                                                                 |
|      | Volume : 267.5 Å <sup>3</sup>                                                                                              | <a href="http://www.ebi.ac.uk/pdbe-srv/pdbechem/chemicalCompound/show/BOG">http://www.ebi.ac.uk/pdbe-srv/pdbechem/chemicalCompound/show/BOG</a> |
| LMNG | $C_{47}H_{88}O_{22}$                                                                                                       |                                                             |
|      | 1,005.19 g/mol                                                                                                             |                                                                                                                                                 |
|      | Smiles: <chem>CCCCCCCCC(CCCCCCCC)(COC2OC(CO)C(OC1OC(CO)C(O)C(O)C1O)C(O)C2O)COC4OC(CO)C(OC3OC(CO)C(O)C(O)C3O)C(O)C4O</chem> |                                                                                                                                                 |
|      | Volume : 885.7 Å <sup>3</sup>                                                                                              | <a href="http://www.anatrace.com/Products/Detergents/NG-CLASS/NG310.aspx">http://www.anatrace.com/Products/Detergents/NG-CLASS/NG310.aspx</a>   |

## SUPPLEMENTARY MOVIE

Molecular dynamics simulations of Sav1866 in the presence of 400 DDM molecules. See Methods for details.

## SUPPLEMENTARY METHODS

### MALDI-TOF MS

#### Repeatability and reproducibility.

We checked the repeatability and reproducibility of the method for FC12 and DDM by measuring 3 independent experiments respectively on the same day and over three distinct days. The results satisfactorily showed an intra-day average coefficient of variation (CV) of 0.5-12.8% and 0.5-3.8%, and an inter-day CV of 9-18% and 4.0-6.0%, for FC12 and DDM respectively (Table 1).

### Ratio calculation between quantified and standard detergents

Under MS ionization, the signature of a molecule P constituted of C, H, O, N corresponds to the distributions of  $m/z$ , P, P+1 and P+2, in which  $m/z$  of +1 and +2 correspond to the isotopic contribution of each element. This effect is negligible for non-deuterated detergents for which only the intensities of the first peak (P) of the isotopic pattern are considered. For deuterated detergents standards, satellite ions appear at -1 and -2  $m/z$  in the molecular ions region ( $m/z$  388.3 and 389.3 for FC12 ( $m/z$  390.3), 556.3 and 557.3 for DDM ( $m/z$  558.3), 337.2 and 338.2 for OG ( $m/z$  339.2) (see Figure 1b). These ions correspond to a 1 or 2 H $\rightarrow$ D exchange occurring during the MALDI preparation step and have to be taken into account to generate the standard curves. As detailed in Supplementary Figure S1, considering a compound with a  $m/z = P$  and using equations (sup1.1-3), we calculate firstly the true abundance of P' by eliminating the contributions of the isotopic element of P''+1, and that of P by eliminating the contributions of P'+1 and P''+2. Then, the true abundance of the deuterated form is calculated by adding the true abundances of P, P' and P''.

### Calculation of the amount of detergent bound around membrane proteins

Detergent quantification gives access to the total amount of detergent in the sample. Therefore, for a sample containing a membrane protein, it corresponds to the detergent complexed with a membrane protein plus any additional detergent present in the buffer. The amount of detergent bound to a membrane protein equals thus the total amount of detergent in the sample (*i.e.* the peak of a SEC column) subtracted from the buffer. Caution should be used in the case of an overlap between the elution volume of free micelles and membrane protein; in such case, detergent quantification should be carried out only on fractions having little or no overlap, or a different chromatographic analysis should be carried out (for example, ion exchange chromatography). The protein concentration is calculated by measuring the OD<sup>280nm</sup> and using the Beer-Lambert equation. The amount of bound detergent per membrane protein is the ratio of bound detergent over protein concentration.

### BmrA reconstitution into liposomes and ATPase activity monitoring

BmrA was purified essentially as described before<sup>2</sup> with the following modifications. Bacteria were lysed by three successive passages through a microfluidizer (18,000 psi) in absence of benzonase, individual antiprotease inhibitors were replaced with tablets of antiprotease complete mini EDTA-free (Roche) and 10 mM ethylenediaminetetraacetic acid (EDTA) was not added following cell lysis. After membrane protein solubilization, the supernatant was loaded with an AKTA system onto a 5 ml pre-packed column (5 ml, Ni<sup>2+</sup>-nitrilotriacetic acid-agarose) pre-equilibrated with buffer A (50 mM potassium Pi, pH 8.0, 15% glycerol, 100 mM NaCl, 0.05% DDM, 5 mM  $\beta$ -mercaptoethanol) containing 20 mM imidazole. Washing steps were performed with 25 ml of the equilibration buffer, and 90 ml buffer A containing 75 mM imidazole. Elution was performed with a 60 ml buffer A containing an imidazole gradient from 75 mM to 500 mM imidazole. Fractions containing BmrA were collected and twice dialyzed in 500 mL of buffer containing 50 mM Hepes pH 8.0, 10% glycerol, 50 mM NaCl, 0.05% DDM, and 5 mM  $\beta$ -mercaptoethanol. BmrA was then concentrated  $\sim$ 3.5 fold with an Amicon Ultra-15 concentrators (50 kDa cut-off, Millipore) to reach a final concentration of about 0.8 mg/ml, then frozen in liquid nitrogen and kept at -80 °C until use. Reconstitution was performed as previously described<sup>2</sup>, except that the initial mixture lipids/detergent was incubated for 45 min instead of one hour. The ATPase activity of BmrA was monitored along the reconstitution process at 37 °C by using an ATP-regenerating system coupled to the disappearance of NADH recorded at 340 nm<sup>3</sup>. Reactions were performed in a final volume of 622  $\mu$ l of Hepes 50 mM pH 8.0, 10 mM MgCl<sub>2</sub>, 4 mM PEP, 60  $\mu$ g/ml pyruvate kinase, 32  $\mu$ g/ml lactate dehydrogenase, 0.3 mM NADH, 10 mM ATP and were initiated by adding 1  $\mu$ g of BmrA.

### Membrane proteins purifications.

BmrA was produced and purified as described<sup>4,5</sup>. BmrA extracted with 1% FC12 was incubated for 2 hours at 4°C and then centrifuged for 1 hour at 100,000xg, 4°C. The supernatant was applied onto a IMAC (GE Healthcare), reducing the FC12 concentration to 0.3% in the buffer (20 mM Tris-HCl pH 8.0, 100 mM NaCl). The 5-mL elution pool was concentrated to 0.5 mL on a 50-kDa regenerated cellulose

concentrator (Amicon Ultra, Millipore) and injected on Superdex 200 10/300 GL gel filtration chromatography (GE Healthcare) using as mobile phase 20 mM Tris-HCl pH 8.0, 100 mM NaCl, 0.3% FC12, at 0.5 mL/min.

BmrA was also extracted and purified in DDM and LMNG in a similar way, using a detergent concentration of 1% during extraction and 0.05% for DDM and LMNG for the IMAC step. Each IMAC pool was then concentrated as above and applied on Superdex 200 at 0.5 ml/min with a mobile phase of 50 mM Hepes pH 8.0, 100 mM NaCl, added of either 0.02% DDM or 0.05% LMNG. The same protocol was applied without protein to quantify in each case the detergent in the corresponding fractions. In both cases, fractions were collected, absorbance at 280 nm was measured to quantify BmrA.

**SERCA1a Ca<sup>2+</sup>-ATPase.** A SERCA-enriched membrane fraction prepared from rabbit<sup>6</sup> was solubilized with DDM and submitted to SEC with DDM or <sup>14</sup>C-DDM as radiotracer to quantify DDM<sup>7</sup>. Briefly, 2 mg of solubilized SERCA1a in 20 mg DDM (cold experiment) or 4 mg SERCA in 40 mg DDM (radioactive experiment) was injected on a TSK3,000SW column equilibrated in 20 mM MOPS-Tris pH 7.0, 25 mM NaCl, 1 mM CaCl<sub>2</sub>, 2.5 mM MgCl<sub>2</sub> and 0.05% DDM. The first chromatography was carried out to discard aggregates, lipids and extra amounts of free detergent used for extraction of SERCA1a. Cold and radioactive fractions corresponding to SERCA were pooled, concentrated with YM-100 type Amicon ultrafiltration device and submitted to the same SEC step, recording absorbance at 280 nm on a HP8453 spectrophotometer for quantifying SERCA by using a mass extinction coefficient of 0.95 L<sup>-1</sup>.g<sup>-1</sup>.cm<sup>-1</sup>. Final protein concentration was about 0.7 g/L. Samples were flash-frozen in liquid nitrogen and stored at -20°C.

**OprM** was produced in *E. coli* and purified as previously described<sup>8</sup>. The protein was extracted in OG and purified by IMAC, using a buffer containing 20 mM Tris-HCl pH 8.0, 10 % glycerol, 0.9 % OG for the mobile phase, added of 250 mM imidazole for the elution step. Purification of OprM in DDM was carried out similarly. Membranes were solubilized in 20 mM Tris-HCl pH 8.0, 10% glycerol and 2% DDM, and applied IMAC, reducing the DDM concentration to 0.05% in the mobile phase. In both cases, OprM fractions were concentrated on 100 kDa cut-off (Amicon Ultra) and submitted to a SEC step (Superpose 6) with a buffer containing 20 mM Tris-HCl pH 8.0, 10 % glycerol and 0.9% OG or 0.05% DDM as mobile phase.

**hAAC1** was produced in *E. coli* fused to the Maltose-Binding Protein and to a 8xHis tag at the N-terminus<sup>9</sup>. The fusion protein was extracted with 1% FC12, and then submitted to IMAC. The Maltose-binding protein moiety and His tag were removed by thrombin. hAAC1 was then submitted to a SEC step (Superdex 200 10-300) using 50 mM Tris-HCl pH 7.5, 100 mM NaCl, 0.1 % FC12 as mobile phase. Fractions containing hAAC1 were pooled and concentrated 20 times on a 30 kDa Amicon Ultracel. The same volume of buffer was concentrated identically.

**BmrCD** was extracted and purified using DDM on IMAC and SEC (Superdex 200) as described previously<sup>10</sup>.

**hP2Y1r** was produced in *Pichia pastoris* using the system described previously<sup>11</sup>. The protein was extracted with 1% DDM, purified on IMAC followed by a desalting step using a buffer containing 50 mM Tris-HCl pH 7.4, 0.5 M NaCl, 0.1 % DDM, 0.01 % cholesterol hemisuccinate as mobile phase. The protein was then concentrated 20 times on a 50 kDa cut-off vivaspin (Amicon Ultra). The same volume of buffer was concentrated identically.

### Molecular dynamics simulations

We carried out molecular dynamics (MD) simulations of Sav1866 in the presence of 400 DDM molecules. The crystal structure of Sav1866 was downloaded from the PDB (access code 2HYD). The all-atom structure was converted to a coarse-grained representation using the MARTINI force field<sup>12,13</sup>. DDM molecules were placed around the protein in a bilayer-like arrangement, and the protein-detergent complex was assembled as described<sup>14</sup>. The complex was then solvated in a cubic box with lateral size of about 16 nm, containing 30,899 water particles, 462 Na<sup>+</sup> ions and 458 Cl<sup>-</sup> ions, yielding an electrically neutral system with approximately 200 mM NaCl concentration. Non-bonded interactions were calculated

within a cut-off of 1.2 nm, using shift functions (from 0 nm for electrostatics and from 0.9 nm for Lennard-Jones) and a dielectric constant of 15, according to the standard MARTINI setup. Simulations were carried out with the GROMACS (v4.5) software<sup>15</sup> using 3D periodic boundary conditions and the NpT ensemble. Pressure and temperature were kept constant (1 bar, 298 K) using the Parrinello-Rahman barostat<sup>16</sup> and the Bussi-Donadio-Parrinello thermostat<sup>17</sup>, with time constants of 1 ps and 5 ps respectively. The integration time step was 25 fs and the total simulation time was 1  $\mu$ s.

## REFERENCES

- 1 Kleywegt, G. J., Zou, J. Y., Kjeldgaard, M. & Jones, T. A. in *Crystallography of Biological Macromolecules* Vol. F *International Tables for Crystallography* (eds M.G. Rossmann & E. Arnold) Ch. 17.1, 353-356, 366-367 (Kluwer Academic Publishers, The Netherlands, 2001).
- 2 Orelle, C., Dalmas, O., Gros, P., Di Pietro, A. & Jault, J. M. The conserved glutamate residue adjacent to the Walker-B motif is the catalytic base for ATP hydrolysis in the ATP-binding cassette transporter BmrA. *J. Biol. Chem.* **278**, 47002-47008 (2003).
- 3 Steinfels, E. *et al.* Characterization of YvcC (BmrA), a multidrug ABC transporter constitutively expressed in *Bacillus subtilis*. *Biochemistry* **43**, 7491-7502 (2004).
- 4 Steinfels, E. *et al.* Highly efficient over-production in *E. coli* of YvcC, a multidrug-like ATP-binding cassette transporter from *Bacillus subtilis*. *Biochim Biophys Acta* **1565**, 1-5 (2002).
- 5 Matar-Merheb, R. *et al.* Structuring detergents for extracting and stabilizing functional membrane proteins. *PLoS One* **6**, e18036, doi:10.1371/journal.pone.0018036 (2011).
- 6 Champeil, P. *et al.* Kinetic characterization of the normal and detergent-perturbed reaction cycles of the sarcoplasmic reticulum calcium pump. Rate-limiting step(s) under different conditions. *J. Biol. Chem.* **261**, 16372-16384 (1986).
- 7 le Maire, M. *et al.* Gel chromatography and analytical ultracentrifugation to determine the extent of detergent binding and aggregation, and Stokes radius of membrane proteins using sarcoplasmic reticulum Ca<sup>2+</sup>-ATPase as an example. *Nat Protoc* **3**, 1782-1795, doi:10.1038/nprot.2008.177 (2008).
- 8 Broutin, I. *et al.* Expression, purification, crystallization and preliminary X-ray studies of the outer membrane efflux proteins OprM and OprN from *Pseudomonas aeruginosa*. *Acta Crystallogr Sect F Struct Biol Cryst Commun* **61**, 315-318, doi:10.1107/s1744309105005014 (2005).
- 9 Ravaud, S. *et al.* Impaired Transport of Nucleotides in a Mitochondrial Carrier Explains Severe Human Genetic Diseases. *ACS Chemical Biology* **7**, 1164-1169, doi:10.1021/cb300012j (2012).
- 10 Galian, C. *et al.* Optimized purification of a heterodimeric ABC transporter in a highly stable form amenable to 2-D crystallization. *PLoS One* **6**, e19677, doi:10.1371/journal.pone.0019677 (2011).
- 11 Andre, N. *et al.* Enhancing functional production of G protein-coupled receptors in *Pichia pastoris* to levels required for structural studies via a single expression screen. *Protein Sci* **15**, 1115-1126, doi:10.1110/ps.062098206 (2006).
- 12 Marrink, S. J., Risselada, H. J., Yefimov, S., Tieleman, D. P. & de Vries, A. H. The MARTINI force field: Coarse grained model for biomolecular simulations. *Journal of Physical Chemistry B* **111**, 7812-7824, doi:10.1021/jp071097f (2007).
- 13 Monticelli, L. *et al.* The MARTINI coarse-grained force field: Extension to proteins. *Journal of Chemical Theory and Computation* **4**, 819-834, doi:10.1021/ct700324x (2008).
- 14 Javanainen, M. Universal Method for Embedding Proteins into Complex Lipid Bilayers for Molecular Dynamics Simulations. *Journal of Chemical Theory and Computation* **10**, 2577-2582, doi:10.1021/ct500046e (2014).



- 15 Hess, B., Kutzner, C., van der Spoel, D. & Lindahl, E. GROMACS 4: Algorithms for highly efficient, load-balanced, and scalable molecular simulation. *Journal of Chemical Theory and Computation* **4**, 435-447, doi:10.1021/ct700301q (2008).
- 16 Parrinello, M. & Rahman, A. Polymorphic Transitions in Single Crystals - a New Molecular Dynamics Method. *Journal of Applied Physics* **52**, 7182-7190 (1981).
- 17 Bussi, G., Donadio, D. & Parrinello, M. Canonical sampling through velocity rescaling. *Journal of Chemical Physics* **126**, 014101, doi:10.1063/1.2408420 (2007).
